# Supplementary material for: Bayesian Modeling of Prion Disease Dynamics in Mule Deer Using Population Monitoring and Capture-Recapture Data
Source: PLoS One. 2015 Oct 28;10(10):e0140687. doi: 10.1371/journal.pone.0140687 (PMC4624844; doi:10.1371/journal.pone.0140687)
Supplement: S1 Dataset — (XLSX) [file pone.0140687.s002.xlsx]

## Sheet: DATA
												Antemortem Test No. Total fols					Antemortem Test No. positive fols					Wintering Area
deerid	datein	dateout	exit_mo	delta	entry_yr	exit_yr	mortality	strtage	sex	cause	dod	J_yr1	J_yr2	J_yr3	J_yr4	J_yr5	y_yr1	y_yr2	y_yr3	y_yr4	y_yr5	campbell	redmtn	cherokee	bighole	F
1	2010-01-04	2011-01-01	12	0	2010	2010	0	1.5	0	NA	NA	25	NA	NA	NA	NA	0	NA	NA	NA	NA	0	1	0	0	0
2	2010-01-04	2011-01-08	12	0	2010	2010	0	3.5	0	NA	NA	12	7	NA	NA	NA	0	0	NA	NA	NA	0	1	0	0	0
3	2010-01-04	2012-02-10	25	1	2010	2012	1	3.5	0	2	2012-02-10	19	2	NA	NA	NA	0	0	NA	NA	NA	0	1	0	0	0
4	2010-01-04	2011-03-01	14	1	2010	2011	1	8.5	0	0	2011-03-01	18	2	NA	NA	NA	0	0	NA	NA	NA	0	1	0	0	0
5	2010-01-04	2014-01-01	48	0	2010	2014	0	4.5	0	NA	NA	11	4	5	18	11	0	0	0	6	6	0	1	0	0	0
6	2010-01-04	2010-04-19	4	1	2010	2010	1	7.5	0	0	2010-04-19	15	NA	NA	NA	NA	0	NA	NA	NA	NA	0	1	0	0	0
7	2010-01-04	2012-01-01	24	0	2010	2011	0	2.5	0	NA	NA	36	NA	NA	NA	NA	0	NA	NA	NA	NA	0	1	0	0	1
8	2010-01-04	2014-01-01	48	0	2010	2014	0	6.5	0	NA	NA	22	4	9	6	16	0	0	0	0	0	0	1	0	0	1
9	2010-01-04	2014-01-01	48	0	2010	2014	0	3.5	0	NA	NA	47	20	22	NA	28	0	0	0	NA	0	0	1	0	0	0
10	2010-01-04	2010-04-28	4	1	2010	2010	1	0.5	0	0	2010-04-28	NA	NA	NA	NA	NA	NA	NA	NA	NA	NA	0	1	0	0	0
11	2010-01-04	2012-01-15	24	0	2010	2012	0	4.5	0	NA	NA	12	NA	NA	NA	NA	0	NA	NA	NA	NA	0	1	0	0	0
12	2010-01-04	2013-10-15	45	1	2010	2013	1	4.5	0	0	2013-10-15	30	3	8	9	NA	0	0	0	0	NA	0	1	0	0	0
13	2010-01-04	2011-02-20	14	1	2010	2011	1	5.5	0	0	2011-02-20	15	NA	NA	NA	NA	0	NA	NA	NA	NA	0	1	0	0	0
14	2010-01-04	2014-01-01	48	0	2010	2014	0	0.5	0	NA	NA	NA	27	14	3	28	NA	0	0	0	21	0	1	0	0	0
15	2010-01-04	2013-11-01	46	1	2010	2013	1	2.5	0	0	2013-11-01	48	NA	NA	9	NA	0	NA	NA	0	NA	0	1	0	0	0
16	2010-01-04	2012-01-15	24	0	2010	2011	0	5.5	0	NA	NA	26	NA	NA	NA	NA	0	NA	NA	NA	NA	0	1	0	0	0
17	2010-01-04	2014-01-01	48	0	2010	2014	0	1.5	0	NA	NA	43	NA	NA	6	12	0	NA	NA	0	0	0	1	0	0	0
18	2010-01-04	2012-06-01	29	1	2010	2012	1	1.5	0	0	2012-06-01	80	5	6	NA	NA	0	5	1	NA	NA	0	1	0	0	0
19	2010-01-04	2014-01-01	48	0	2010	2014	0	0.5	0	NA	NA	NA	NA	NA	5	25	NA	NA	NA	0	0	0	1	0	0	1
20	2010-01-04	2010-07-30	NA	NA	NA	NA	NA	2.5	0	NA	NA	10	NA	NA	NA	NA	0	NA	NA	NA	NA	1	0	0	0	0
21	2010-01-04	2012-09-15	32	1	2010	2012	1	4.5	0	0	2012-09-15	4	28	11	NA	NA	0	0	0	NA	NA	1	0	0	0	0
22	2010-01-04	2013-11-01	46	1	2010	2013	1	0.5	0	0	2013-11-01	NA	11	14	4	NA	NA	0	0	0	NA	1	0	0	0	0
23	2010-01-04	2013-05-01	40	1	2010	2013	1	1.5	0	0	2013-05-01	12	5	8	19	NA	0	0	0	0	NA	1	0	0	0	1
24	2010-01-04	2014-01-01	48	0	2010	2014	0	2.5	0	NA	NA	23	24	4	7	6	0	0	0	0	0	1	0	0	0	0
25	2010-01-04	2011-10-01	21	1	2010	2011	1	2.5	0	0	2011-10-01	81	5	NA	NA	NA	0	0	NA	NA	NA	1	0	0	0	0
26	2010-01-04	2012-11-15	34	1	2010	2012	1	9.5	0	0	2012-11-15	23	0	NA	NA	NA	0	0	NA	NA	NA	1	0	0	0	0
27	2010-01-04	2010-12-14	11	1	2010	2010	1	2.5	0	0	2010-12-14	45	NA	NA	NA	NA	0	NA	NA	NA	NA	1	0	0	0	0
28	2010-01-04	2011-06-30	18	1	2010	2011	1	3.5	0	0	2011-06-30	19	14	NA	NA	NA	0	0	NA	NA	NA	1	0	0	0	1
29	2010-01-04	2013-03-15	38	1	2010	2013	1	3.5	0	0	2013-03-15	27	17	28	4	NA	0	0	0	0	NA	1	0	0	0	1
30	2010-01-04	2014-01-01	48	0	2010	2014	0	0.5	0	NA	NA	NA	28	11	10	14	NA	0	0	0	0	1	0	0	0	0
31	2010-01-04	2010-03-15	2	1	2010	2010	1	9.5	0	0	2010-03-15	21	NA	NA	NA	NA	0	NA	NA	NA	NA	1	0	0	0	0
32	2010-01-04	2013-10-15	45	1	2010	2013	1	7.5	0	0	2013-10-15	17	1	6	2	NA	0	0	0	0	NA	1	0	0	0	0
33	2010-01-04	2013-10-15	45	1	2010	2013	1	4.5	0	0	2013-10-15	25	0	5	15	NA	0	0	0	0	NA	1	0	0	0	1
34	2010-01-04	2013-07-01	42	1	2010	2013	1	3.5	0	0	2013-07-01	19	3	2	15	NA	0	0	0	0	NA	1	0	0	0	1
35	2010-01-04	2014-01-01	48	1	2010	2013	1	5.5	0	0	2013-12-21	19	2	9	6	NA	0	0	0	0	NA	1	0	0	0	1
36	2010-01-04	2010-06-16	5	1	2010	2010	1	4.5	0	2	2010-06-16	39	NA	NA	NA	NA	0	NA	NA	NA	NA	1	0	0	0	0
37	2010-01-04	2014-01-01	48	0	2010	2014	0	3.5	0	NA	NA	14	6	10	3	11	0	0	0	0	0	1	0	0	0	1
38	2010-01-04	2011-01-15	12	0	2010	2010	0	0.5	0	NA	NA	NA	NA	NA	NA	NA	NA	NA	NA	NA	NA	1	0	0	0	0
39	2010-01-04	2010-04-02	3	1	2010	2010	1	3.5	0	2	2010-04-02	26	NA	NA	NA	NA	0	NA	NA	NA	NA	1	0	0	0	1
40	2010-01-04	2013-06-01	41	1	2010	2013	1	5.5	0	0	2013-06-01	16	11	11	17	NA	0	0	0	0	NA	1	0	0	0	0
41	2010-01-05	2013-01-01	36	0	2010	2013	0	3.5	0	NA	NA	38	NA	26	NA	NA	0	NA	0	NA	NA	0	0	0	1	1
42	2010-01-05	2012-09-05	32	1	2010	2012	1	3.5	0	3	2012-09-05	6	2	3	NA	NA	0	0	0	NA	NA	0	0	0	1	1
43	2010-01-05	2010-12-31	12	1	2010	2010	1	3.5	0	0	2010-12-31	20	NA	NA	NA	NA	0	NA	NA	NA	NA	0	0	0	1	0
44	2010-01-05	2011-02-12	13	1	2010	2011	1	4.5	0	0	2011-02-12	35	0	NA	NA	NA	0	0	NA	NA	NA	0	0	0	1	0
45	2010-01-05	2010-12-08	11	1	2010	2010	1	0.5	0	0	2010-12-08	NA	NA	NA	NA	NA	NA	NA	NA	NA	NA	0	0	0	1	0
46	2010-01-05	2012-03-01	26	1	2010	2012	1	2.5	0	1	2012-03-01	23	3	6	NA	NA	0	1	0	NA	NA	0	0	0	1	0
47	2010-01-05	2011-05-01	16	1	2010	2011	1	3.5	0	2	2011-05-01	17	14	NA	NA	NA	4	14	NA	NA	NA	0	0	0	1	0
48	2010-01-05	2011-04-15	15	1	2010	2011	1	3.5	0	0	2011-04-15	24	8	NA	NA	NA	0	0	NA	NA	NA	0	0	0	1	0
49	2010-01-05	2014-01-01	48	0	2010	2014	0	3.5	0	NA	NA	15	1	19	NA	11	0	0	0	NA	0	0	0	0	1	0
50	2010-01-05	2010-02-17	NA	NA	NA	NA	NA	0.5	0	NA	NA	NA	NA	NA	NA	NA	NA	NA	NA	NA	NA	0	0	0	1	0
51	2010-01-05	2011-12-31	24	1	2010	2011	1	8.5	0	0	2011-12-31	2	14	NA	NA	NA	0	0	NA	NA	NA	0	0	0	1	1
52	2010-01-05	2014-01-01	48	0	2010	2014	0	3.5	0	NA	NA	8	3	0	7	6	0	0	0	0	0	0	0	0	1	1
53	2010-01-05	2010-02-24	2	1	2010	2010	1	0.5	0	0	2010-02-24	NA	NA	NA	NA	NA	NA	NA	NA	NA	NA	0	0	0	1	1
54	2010-01-05	2010-09-24	9	1	2010	2010	1	3.5	0	2	2010-09-24	10	NA	NA	NA	NA	0	NA	NA	NA	NA	0	0	0	1	0
55	2010-01-05	2012-03-03	26	1	2010	2012	1	2.5	0	0	2012-03-03	24	12	12	NA	NA	0	0	0	NA	NA	0	0	0	1	0
56	2010-01-05	2010-01-14	NA	NA	NA	NA	1	0.5	0	4	2010-01-14	NA	NA	NA	NA	NA	NA	NA	NA	NA	NA	0	0	0	1	0
57	2010-01-05	2012-09-15	32	1	2010	2012	1	3.5	0	0	2012-09-15	23	22	10	NA	NA	0	0	0	NA	NA	0	0	0	1	1
58	2010-01-05	2010-01-21	NA	NA	NA	NA	NA	2.5	0	NA	NA	12	NA	NA	NA	NA	0	NA	NA	NA	NA	0	0	0	1	1
59	2010-01-05	2010-03-26	3	1	2010	2010	1	3.5	0	3	2010-03-26	15	NA	NA	NA	NA	0	NA	NA	NA	NA	0	0	0	1	0
60	2010-01-05	2010-04-02	3	1	2010	2010	1	3.5	0	2	2010-04-02	20	NA	NA	NA	NA	0	NA	NA	NA	NA	0	0	0	1	0
61	2010-01-05	2010-06-04	5	1	2010	2010	1	2.5	0	2	2010-06-04	14	NA	NA	NA	NA	0	NA	NA	NA	NA	0	0	0	1	0
62	2010-01-05	2012-10-20	34	1	2010	2012	1	3.5	0	0	2012-10-20	16	12	5	NA	NA	0	8	5	NA	NA	0	0	0	1	0
63	2010-01-05	2010-11-16	10	1	2010	2010	1	2.5	0	0	2010-11-16	12	NA	NA	NA	NA	0	NA	NA	NA	NA	0	0	0	1	0
64	2010-01-05	2011-03-30	15	1	2010	2011	1	7.5	0	0	2011-03-30	15	7	NA	NA	NA	0	0	NA	NA	NA	0	0	0	1	1
65	2010-01-05	2012-03-05	26	1	2010	2012	1	3.5	0	0	2012-03-05	13	15	8	NA	NA	0	0	0	NA	NA	0	0	0	1	1
66	2010-01-05	2010-02-16	1	1	2010	2010	1	3.5	0	1	2010-02-16	34	NA	NA	NA	NA	30	NA	NA	NA	NA	0	1	0	0	0
67	2010-01-05	2014-01-01	48	0	2010	2014	0	4.5	0	NA	NA	30	0	1	14	18	0	0	0	0	0	0	1	0	0	1
68	2010-01-05	2010-12-10	11	1	2010	2010	1	2.5	0	0	2010-12-10	14	NA	NA	NA	NA	0	NA	NA	NA	NA	0	1	0	0	1
69	2010-01-05	2011-10-31	22	0	2010	2011	1	3.5	0	5	2011-10-31	23	6	NA	NA	NA	0	0	NA	NA	NA	0	0	0	1	0
70	2010-01-05	2013-01-01	36	0	2010	2013	0	5.5	0	NA	NA	22	5	12	NA	NA	0	5	2	NA	NA	0	1	0	0	0
71	2010-01-05	2011-02-15	13	0	2010	2010	0	0.5	0	NA	NA	NA	NA	NA	NA	NA	NA	NA	NA	NA	NA	0	1	0	0	0
72	2010-01-05	2010-04-20	4	1	2010	2010	1	0.5	0	6	2010-04-20	NA	NA	NA	NA	NA	NA	NA	NA	NA	NA	0	1	0	0	0
73	2010-01-05	2012-11-01	34	1	2010	2012	1	3.5	0	0	2012-11-01	24	4	8	NA	NA	0	0	1	NA	NA	0	0	0	1	0
74	2010-01-05	2010-09-09	8	1	2010	2010	1	7.5	0	2	2010-09-09	11	NA	NA	NA	NA	0	NA	NA	NA	NA	0	1	0	0	0
75	2010-01-05	2012-06-15	29	1	2010	2012	1	4.5	0	0	2012-06-15	24	NA	NA	NA	NA	0	NA	NA	NA	NA	0	1	0	0	1
76	2010-01-07	2014-01-01	48	0	2010	2014	0	2.5	0	NA	NA	17	24	12	NA	17	0	0	0	NA	0	0	0	1	0	0
77	2010-01-07	2014-01-01	48	0	2010	2014	0	2.5	0	NA	NA	38	7	3	NA	11	0	0	0	NA	0	0	0	1	0	0
78	2010-01-07	2010-09-15	8	1	2010	2010	1	4.5	0	0	2010-09-15	23	NA	NA	NA	NA	0	NA	NA	NA	NA	0	0	1	0	0
79	2010-01-07	2014-01-01	48	0	2010	2014	0	0.5	0	NA	NA	NA	15	15	NA	21	NA	0	0	NA	0	0	0	1	0	0
81	2010-01-07	2011-09-01	20	1	2010	2011	1	5.5	0	0	2011-09-01	6	14	NA	NA	NA	0	0	NA	NA	NA	0	0	1	0	1
82	2010-01-07	2014-01-01	48	0	2010	2014	0	2.5	0	NA	NA	32	14	18	NA	5	0	0	0	NA	0	0	0	1	0	1
83	2010-01-07	2014-01-01	48	0	2010	2014	0	5.5	0	NA	NA	7	10	15	NA	10	0	0	0	NA	0	0	0	1	0	0
84	2010-01-07	2012-02-15	25	1	2010	2012	1	6.5	0	0	2012-02-15	16	5	NA	NA	NA	0	0	NA	NA	NA	0	0	1	0	1
85	2010-01-07	2014-01-01	48	0	2010	2014	0	0.5	0	NA	NA	NA	12	4	NA	35	NA	0	0	NA	0	0	0	1	0	1
87	2010-01-07	2011-11-01	22	1	2010	2011	1	3.5	0	0	2011-11-01	10	4	NA	NA	NA	0	0	NA	NA	NA	0	0	1	0	0
88	2010-01-07	2011-06-15	17	1	2010	2011	1	4.5	0	2	2011-06-15	5	48	NA	NA	NA	0	0	NA	NA	NA	0	0	1	0	1
89	2010-01-07	2014-01-01	48	0	2010	2014	0	3.5	0	NA	NA	10	NA	7	NA	10	0	NA	0	NA	6	0	0	1	0	0
90	2010-01-07	2014-01-01	48	0	2010	2014	0	3.5	0	NA	NA	50	11	10	NA	18	0	0	0	NA	0	0	0	1	0	0
91	2010-01-07	2010-02-24	2	1	2010	2010	1	0.5	0	2	2010-02-24	NA	NA	NA	NA	NA	NA	NA	NA	NA	NA	0	0	1	0	1
92	2010-01-07	2010-04-06	3	1	2010	2010	1	5.5	0	2	2010-04-06	9	NA	NA	NA	NA	0	NA	NA	NA	NA	0	0	1	0	1
93	2010-01-07	2014-01-01	48	0	2010	2014	0	3.5	0	NA	NA	25	20	22	NA	14	0	0	0	NA	0	0	0	1	0	1
94	2010-01-07	2013-11-01	46	1	2010	2013	1	4.5	0	0	2013-11-01	8	16	NA	NA	NA	0	0	NA	NA	NA	0	0	1	0	1
95	2010-01-07	2012-09-04	32	1	2010	2012	1	7.5	0	0	2012-09-04	8	16	4	NA	NA	0	0	0	NA	NA	0	1	0	0	1
96	2010-01-07	2014-01-01	48	0	2010	2014	0	3.5	0	NA	NA	9	1	3	6	16	0	0	0	0	11	0	1	0	0	0
97	2010-01-07	2012-02-05	25	0	2010	2012	1	5.5	0	4	2012-02-05	34	18	12	NA	NA	0	0	0	NA	NA	0	1	0	0	0
98	2010-01-07	2014-01-01	48	0	2010	2014	0	7.5	0	NA	NA	11	1	5	NA	13	0	0	0	NA	0	0	1	0	0	0
99	2010-01-07	2013-04-01	39	1	2010	2013	1	6.5	0	0	2013-04-01	13	19	4	NA	NA	0	0	0	NA	NA	0	1	0	0	0
100	2010-01-07	2014-01-01	48	0	2010	2014	0	3.5	0	NA	NA	17	19	5	NA	NA	0	0	0	NA	NA	0	1	0	0	1
101	2010-01-07	2013-07-01	42	1	2010	2013	1	6.5	0	0	2013-07-01	33	21	16	NA	NA	0	0	2	NA	NA	0	1	0	0	0
102	2010-01-07	2010-07-05	6	1	2010	2010	1	9.5	0	0	2010-07-05	8	NA	NA	NA	27	0	NA	NA	NA	0	0	1	0	0	0
103	2010-02-05	2010-11-20	10	1	2010	2010	1	3.5	0	2	2010-11-20	12	NA	NA	NA	NA	0	NA	NA	NA	NA	0	0	0	1	1
104	2010-02-05	2012-09-15	31	1	2010	2012	1	5.5	0	0	2012-09-15	12	8	5	NA	NA	0	0	0	NA	NA	0	0	0	1	0
105	2010-02-05	2013-01-07	35	1	2010	2013	1	4.5	0	0	2013-01-07	11	6	13	NA	NA	0	0	0	NA	NA	0	0	0	1	0
106	2010-02-05	2014-01-01	47	0	2010	2014	0	4.5	0	NA	NA	4	14	0	1	1	0	0	0	0	0	0	0	0	1	1
107	2010-02-05	2013-05-01	39	1	2010	2013	1	2.5	0	0	2013-05-01	23	13	12	11	NA	0	0	0	0	NA	0	0	0	1	0
108	2010-02-05	2011-01-08	11	0	2010	2010	0	6.5	0	NA	NA	8	13	NA	NA	NA	0	0	NA	NA	NA	0	0	0	1	1
109	2010-02-05	2011-11-01	21	1	2010	2011	1	7.5	0	0	2011-11-01	11	16	NA	NA	NA	0	0	NA	NA	NA	0	0	0	1	0
110	2010-02-05	2010-10-04	8	1	2010	2010	1	5.5	0	3	2010-10-04	11	NA	NA	NA	NA	0	NA	NA	NA	NA	0	0	0	1	0
111	2010-02-05	2012-12-01	34	1	2010	2013	1	4.5	0	0	2013-12-01	11	5	14	NA	NA	3	0	6	NA	NA	0	0	0	1	0
112	2010-02-05	2011-01-08	11	0	2010	2010	0	4.5	0	NA	NA	19	2	NA	NA	NA	0	0	NA	NA	NA	0	0	0	1	0
113	2010-02-05	2010-03-10	1	1	2010	2010	1	8.5	0	2	2010-03-10	2	NA	NA	NA	NA	0	NA	NA	NA	NA	0	0	0	1	0
114	2010-02-05	2012-12-01	34	1	2010	2012	1	6.5	0	0	2012-12-01	9	12	13	NA	NA	0	0	0	NA	NA	0	0	0	1	1
115	2010-02-05	2014-01-01	47	0	2010	2014	0	6.5	0	NA	NA	8	11	13	NA	16	0	0	0	NA	0	0	0	0	1	0
116	2010-02-05	2014-01-01	47	0	2010	2014	0	6.5	0	NA	NA	9	13	NA	NA	NA	0	0	NA	NA	NA	0	0	0	1	1
117	2010-02-05	2010-05-20	4	1	2010	2010	1	8.5	0	2	2010-05-20	3	NA	NA	NA	NA	0	NA	NA	NA	NA	0	0	0	1	0
118	2010-02-05	2010-04-04	2	1	2010	2010	1	7.5	0	2	2010-04-04	10	NA	NA	NA	NA	0	NA	NA	NA	NA	0	0	0	1	1
119	2010-02-05	2011-01-20	12	0	2010	2011	1	5.5	0	4	2011-01-20	6	9	NA	NA	NA	0	0	NA	NA	NA	0	0	0	1	1
120	2010-02-05	2012-01-15	23	0	2010	2011	0	3.5	0	NA	NA	25	29	NA	NA	NA	0	0	NA	NA	NA	0	0	0	1	0
121	2010-02-05	2012-01-15	23	0	2010	2011	0	3.5	0	NA	NA	11	29	NA	NA	NA	0	0	NA	NA	NA	0	0	0	1	1
122	2010-02-05	2010-04-21	3	1	2010	2010	1	9.5	0	2	2010-04-21	7	NA	NA	NA	NA	0	NA	NA	NA	NA	0	0	0	1	1
123	2010-02-05	2010-10-25	9	1	2010	2010	1	9.5	0	2	2010-10-25	1	NA	NA	NA	NA	0	NA	NA	NA	NA	0	0	0	1	1
124	2010-02-05	2013-06-15	40	1	2010	2013	1	6.5	0	0	2013-06-15	6	5	8	2	NA	0	0	0	0	NA	0	1	0	0	0
125	2010-02-05	2014-01-01	47	0	2010	2014	0	5.5	0	NA	NA	11	2	11	7	30	0	0	0	0	0	0	1	0	0	0
126	2010-02-05	2010-09-13	7	1	2010	2010	1	4.5	0	1	2010-09-13	5	NA	NA	NA	NA	3	NA	NA	NA	NA	0	1	0	0	0
127	2010-02-05	2014-01-01	47	0	2010	2014	0	2.5	0	NA	NA	72	1	16	4	15	0	0	0	0	0	0	1	0	0	0
128	2010-02-05	2012-03-02	25	1	2010	2012	1	4.5	0	1	2012-03-02	17	6	1	NA	NA	0	1	1	NA	NA	0	1	0	0	0
129	2010-02-05	2010-06-18	4	1	2010	2010	1	3.5	0	0	2010-06-18	18	NA	NA	NA	NA	0	NA	NA	NA	NA	0	1	0	0	0
130	2010-02-05	2014-01-01	47	0	2010	2014	0	3.5	0	NA	NA	19	1	9	1	16	0	0	0	0	0	0	1	0	0	0
131	2010-02-05	2010-09-09	7	1	2010	2010	1	5.5	0	2	2010-09-09	8	NA	NA	NA	NA	0	NA	NA	NA	NA	0	1	0	0	1
132	2010-02-05	2011-05-01	15	1	2010	2011	1	4.5	0	0	2011-05-01	20	13	NA	NA	NA	0	0	NA	NA	NA	0	1	0	0	0
133	2010-02-05	2011-01-12	11	0	2010	2010	0	4.5	0	NA	NA	12	5	NA	NA	NA	0	0	NA	NA	NA	0	1	0	0	0
134	2010-02-05	2011-03-15	13	1	2010	2011	1	6.5	0	2	2011-03-15	4	4	NA	NA	NA	0	0	NA	NA	NA	0	1	0	0	0
135	2010-02-05	2010-07-15	5	1	2010	2010	1	2.5	0	0	2010-07-15	19	NA	NA	NA	NA	0	NA	NA	NA	NA	0	1	0	0	1
136	2010-02-05	2014-01-01	47	0	2010	2014	0	2.5	0	NA	NA	16	3	NA	NA	NA	0	0	NA	NA	NA	0	1	0	0	0
137	2010-02-05	2012-08-27	31	1	2010	2012	1	4.5	0	0	2012-08-27	10	4	14	NA	NA	0	0	0	NA	NA	0	1	0	0	0
138	2010-02-05	2014-01-01	47	0	2010	2014	0	7.5	0	NA	NA	17	4	12	NA	18	0	0	0	NA	0	0	1	0	0	0
139	2010-02-05	2014-01-01	47	0	2010	2014	0	3.5	0	NA	NA	37	1	26	12	18	0	0	0	0	0	0	1	0	0	0
140	2010-02-05	2014-01-01	47	0	2010	2014	0	4.5	0	NA	NA	35	3	7	NA	19	0	0	2	NA	0	0	1	0	0	1
141	2010-02-05	2013-03-01	37	1	2010	2013	1	3.5	0	0	2013-03-01	8	2	4	NA	NA	0	0	0	NA	NA	0	1	0	0	0
142	2010-02-05	2011-02-01	12	1	2010	2011	1	8.5	0	0	2011-02-01	2	0	NA	NA	NA	0	0	NA	NA	NA	0	1	0	0	0
143	2011-01-06	2014-01-01	36	0	2011	2014	0	3.5	0	NA	NA	NA	5	6	3	11	NA	0	0	0	0	1	0	0	0	0
145	2011-01-07	2013-07-15	30	1	2011	2013	1	3.5	0	0	2013-07-15	NA	12	30	24	NA	NA	0	0	0	NA	1	0	0	0	1
146	2011-01-07	2014-01-01	36	0	2011	2014	0	5.5	0	NA	NA	NA	3	NA	NA	NA	NA	0	NA	NA	NA	1	0	0	0	1
148	2011-01-07	2014-01-01	36	0	2011	2014	0	3.5	0	NA	NA	NA	6	NA	NA	NA	NA	0	NA	NA	NA	1	0	0	0	0
150	2011-01-07	2014-01-01	36	0	2011	2014	0	3.5	0	NA	NA	NA	12	13	31	8	NA	0	0	0	0	1	0	0	0	1
151	2011-01-07	2014-01-01	36	0	2011	2014	0	3.5	0	NA	NA	NA	10	12	5	8	NA	0	0	0	0	1	0	0	0	0
152	2011-01-07	2014-01-01	36	0	2011	2014	0	2.5	0	NA	NA	NA	23	NA	20	17	NA	0	NA	0	0	1	0	0	0	1
153	2011-01-07	2014-01-01	36	0	2011	2014	0	4.5	0	NA	NA	NA	11	NA	4	12	NA	0	NA	0	0	1	0	0	0	1
154	2011-01-07	2011-06-01	5	1	2011	2011	1	3.5	0	0	2011-06-01	NA	6	NA	NA	NA	NA	0	NA	NA	NA	1	0	0	0	0
155	2011-01-07	2012-01-01	12	0	2011	2011	0	6.5	0	NA	NA	NA	4	3	NA	NA	NA	0	0	NA	NA	1	0	0	0	0
156	2011-01-07	2014-01-01	36	0	2011	2014	0	2.5	0	NA	NA	NA	6	8	9	10	NA	0	0	0	0	0	0	0	1	0
157	2011-01-07	2012-02-15	13	1	2011	2012	1	5.5	0	0	2012-02-15	NA	10	NA	NA	NA	NA	0	NA	NA	NA	0	0	0	1	0
158	2011-01-07	2011-01-27	1	1	2011	2011	1	4.5	0	0	2011-01-27	NA	4	NA	NA	NA	NA	0	NA	NA	NA	0	0	0	1	0
159	2011-01-07	2011-12-15	11	0	2011	2011	1	4.5	1	5	NA	NA	1	NA	NA	NA	NA	0	NA	NA	NA	NA	NA	NA	NA	0
160	2011-01-07	2011-12-15	11	0	2011	2011	1	4.5	1	5	NA	NA	4	NA	NA	NA	NA	0	NA	NA	NA	NA	NA	NA	NA	1
161	2011-01-08	2011-02-20	1	1	2011	2011	1	5.5	1	2	2011-02-20	NA	4	NA	NA	NA	NA	4	NA	NA	NA	NA	NA	NA	NA	0
162	2011-01-08	2012-10-01	21	1	2011	2012	1	2.5	0	0	2012-10-01	NA	7	5	NA	NA	NA	0	1	NA	NA	0	1	0	0	1
163	2011-01-08	2014-01-01	36	0	2011	2014	0	2.5	0	NA	NA	NA	5	5	9	5	NA	0	0	0	0	0	1	0	0	0
164	2011-01-08	2011-12-15	11	0	2011	2011	0	5.5	1	NA	NA	NA	6	NA	NA	NA	NA	0	NA	NA	NA	NA	NA	NA	NA	0
165	2011-01-08	2012-01-06	12	0	2011	2012	1	4.5	0	4	2012-01-06	NA	15	14	NA	NA	NA	0	0	NA	NA	0	1	0	0	0
166	2011-01-08	2012-02-15	13	1	2011	2012	1	2.5	0	2	2012-02-15	NA	42	3	NA	NA	NA	42	0	NA	NA	0	1	0	0	0
167	2011-01-08	2014-01-01	36	0	2011	2014	0	4.5	0	NA	NA	NA	16	27	16	20	NA	0	0	0	0	0	1	0	0	1
168	2011-01-08	2014-01-01	36	0	2011	2014	0	5.5	0	NA	NA	NA	5	11	10	17	NA	0	0	0	0	0	1	0	0	0
169	2011-01-08	2011-11-19	10	1	2011	2011	1	4.5	0	0	2011-11-19	NA	6	NA	NA	NA	NA	0	NA	NA	NA	0	1	0	0	1
170	2011-01-08	2014-01-01	36	0	2011	2014	0	1.5	0	NA	NA	NA	12	NA	10	40	NA	0	NA	0	0	0	1	0	0	0
172	2011-01-08	2014-01-01	36	0	2011	2014	0	5.5	0	NA	NA	NA	52	31	20	23	NA	0	0	0	0	0	1	0	0	1
173	2011-01-08	2011-12-15	11	0	2011	2011	0	5.5	1	NA	NA	NA	3	NA	NA	NA	NA	0	NA	NA	NA	NA	NA	NA	NA	0
174	2011-01-08	2013-10-15	33	1	2011	2013	1	2.5	0	0	2013-10-15	NA	11	19	8	NA	NA	0	0	0	NA	0	1	0	0	0
176	2011-01-10	2011-12-15	11	0	2011	2011	0	4.5	1	NA	NA	NA	7	NA	NA	NA	NA	0	NA	NA	NA	NA	NA	NA	NA	0
177	2011-01-10	2014-01-01	36	0	2011	2014	0	4.5	0	NA	NA	NA	15	12	6	14	NA	0	0	0	0	0	0	0	1	1
178	2011-01-10	2014-01-01	36	0	2011	2014	0	4.5	0	NA	NA	NA	34	NA	NA	NA	NA	0	NA	NA	NA	0	0	0	1	0
182	2011-01-10	2011-09-15	8	1	2011	2011	1	6.5	0	0	2011-09-15	NA	15	NA	NA	NA	NA	0	NA	NA	NA	0	0	0	1	0
185	2011-01-10	2013-11-01	34	1	2011	2013	1	5.5	0	0	2013-11-01	NA	26	3	NA	NA	NA	0	0	NA	NA	0	0	0	1	1
188	2011-01-10	2012-09-30	21	1	2011	2012	1	8.5	0	0	2012-09-30	NA	19	14	NA	NA	NA	0	0	NA	NA	0	0	0	1	1
189	2011-01-10	2012-02-15	13	0	2011	2012	1	6.5	0	4	2012-02-15	NA	7	5	NA	NA	NA	0	0	NA	NA	0	0	0	1	0
191	2011-01-10	2012-02-15	13	0	2011	2012	1	3.5	0	4	2012-02-15	NA	21	7	NA	NA	NA	10	3	NA	NA	0	0	0	1	0
193	2011-01-10	2011-01-12	NA	NA	NA	NA	1	6.5	0	4	2011-01-12	NA	14	NA	NA	NA	NA	0	NA	NA	NA	0	0	0	1	1
194	2011-01-10	2014-01-01	36	0	2011	2014	0	3.5	0	NA	NA	NA	27	11	7	NA	NA	0	0	0	NA	0	0	0	1	0
196	2011-01-10	2014-01-01	36	0	2011	2014	0	3.5	0	NA	NA	NA	22	10	5	9	NA	0	0	0	0	0	0	0	1	1
201	2011-01-10	2014-01-01	36	0	2011	2014	0	2.5	0	NA	NA	NA	22	4	NA	NA	NA	0	0	NA	NA	0	0	0	1	1
202	2011-01-10	2014-01-01	36	0	2011	2014	0	8.5	0	NA	NA	NA	0	2	NA	NA	NA	0	0	NA	NA	0	0	0	1	0
203	2011-01-10	2014-01-01	36	0	2011	2014	0	3.5	0	NA	NA	NA	12	19	14	15	NA	0	0	0	0	0	0	0	1	0
204	2011-01-10	2011-12-15	11	0	2011	2011	1	4.5	1	5	NA	NA	4	NA	NA	NA	NA	0	NA	NA	NA	NA	NA	NA	NA	1
205	2011-01-11	2014-01-01	36	0	2011	2014	0	2.5	0	NA	NA	NA	38	7	NA	15	NA	0	0	NA	0	0	0	1	0	0
206	2011-01-11	2014-01-01	36	0	2011	2014	0	1.5	0	NA	NA	NA	29	22	NA	12	NA	0	0	NA	0	0	0	1	0	1
207	2011-01-11	2014-01-01	36	0	2011	2014	0	3.5	0	NA	NA	NA	20	10	NA	NA	NA	0	0	NA	NA	0	0	1	0	0
208	2011-01-11	2014-01-01	36	0	2011	2014	0	2.5	0	NA	NA	NA	27	7	NA	11	NA	0	0	NA	0	0	0	1	0	0
209	2011-01-11	2011-10-20	9	0	2011	2011	1	10.5	0	5	2011-10-20	NA	11	NA	NA	NA	NA	0	NA	NA	NA	0	0	1	0	1
210	2011-01-11	2014-01-01	36	0	2011	2014	0	4.5	0	NA	NA	NA	15	9	NA	7	NA	0	0	NA	0	0	0	1	0	0
211	2011-01-11	2014-01-01	36	0	2011	2014	0	3.5	0	NA	NA	NA	14	18	NA	4	NA	0	0	NA	0	0	0	1	0	0
212	2011-01-11	2011-04-19	3	1	2011	2011	1	2.5	0	2	2011-04-19	NA	6	NA	NA	NA	NA	0	NA	NA	NA	0	0	1	0	1
213	2011-01-11	2013-02-18	25	0	2011	2013	1	4.5	0	4	2013-02-18	NA	8	19	14	NA	NA	0	0	0	NA	0	0	1	0	0
214	2011-01-11	2011-09-30	9	1	2011	2011	1	7.5	0	0	2011-09-30	NA	9	NA	NA	NA	NA	0	NA	NA	NA	0	0	1	0	0
215	2011-01-11	2013-07-20	30	1	2011	2013	1	2.5	0	0	2013-07-20	NA	18	12	7	NA	NA	0	0	0	NA	0	0	1	0	0
217	2011-01-11	2011-03-01	2	1	2011	2011	1	2.5	0	0	2011-03-01	NA	22	NA	NA	NA	NA	0	NA	NA	NA	0	0	1	0	0
218	2011-01-11	2014-01-01	36	0	2011	2014	0	2.5	0	NA	NA	NA	8	14	NA	14	NA	0	0	NA	0	0	0	1	0	0
220	2011-01-11	2012-06-01	17	1	2011	2012	1	8.5	0	0	2012-06-01	NA	18	7	NA	NA	NA	0	0	NA	NA	0	0	1	0	1
221	2011-01-11	2014-01-01	36	0	2011	2014	0	0.5	0	NA	NA	NA	NA	11	8	18	NA	NA	0	0	0	0	0	1	0	1
222	2011-01-11	2014-01-01	36	0	2011	2014	0	2.5	0	NA	NA	NA	13	6	6	19	NA	0	0	0	0	0	1	0	0	0
223	2011-01-11	2012-11-15	22	1	2011	2012	1	0.5	0	0	2012-11-15	NA	NA	26	NA	NA	NA	NA	0	NA	NA	0	1	0	0	1
224	2011-01-11	2012-07-15	18	1	2011	2012	1	5.5	1	1	2012-07-15	NA	17	10	NA	NA	NA	11	8	NA	NA	NA	NA	NA	NA	0
225	2011-01-11	2011-04-15	3	1	2011	2011	1	5.5	0	2	2011-04-15	NA	18	NA	NA	NA	NA	0	NA	NA	NA	0	1	0	0	1
226	2011-01-11	2011-11-01	10	1	2011	2011	1	2.5	0	0	2011-11-01	NA	12	NA	NA	NA	NA	0	NA	NA	NA	0	1	0	0	0
227	2011-01-12	2014-01-01	36	0	2011	2014	0	6.5	0	NA	NA	NA	37	7	15	17	NA	0	0	0	0	0	0	0	1	0
228	2011-01-12	2011-10-01	9	1	2011	2012	1	4.5	0	0	2011-10-01	NA	17	10	NA	NA	NA	0	0	NA	NA	0	0	0	1	0
229	2011-01-12	2011-12-15	11	0	2011	2011	0	3.5	1	NA	NA	NA	6	NA	NA	NA	NA	0	NA	NA	NA	NA	NA	NA	NA	1
230	2011-01-12	2011-01-20	NA	NA	NA	NA	1	4.5	1	4	2011-01-20	NA	1	NA	NA	NA	NA	0	NA	NA	NA	NA	NA	NA	NA	1
231	2011-01-12	2014-01-01	36	0	2011	2014	0	0.5	0	NA	NA	NA	NA	13	10	11	NA	NA	0	0	0	0	0	0	1	0
232	2011-01-12	2011-08-15	7	1	2011	2011	1	2.5	0	0	2011-08-15	NA	21	NA	NA	NA	NA	0	NA	NA	NA	0	0	0	1	0
233	2011-01-12	2012-02-15	13	0	2011	2012	1	6.5	0	4	2012-02-15	NA	32	8	NA	NA	NA	3	0	NA	NA	0	0	0	1	0
234	2011-01-12	2014-01-01	36	0	2011	2014	0	4.5	0	NA	NA	NA	15	13	5	10	NA	0	0	0	0	0	0	0	1	0
235	2011-01-12	2011-01-20	NA	NA	NA	NA	1	0.5	0	4	2011-01-20	NA	NA	NA	NA	NA	NA	NA	NA	NA	NA	0	0	0	1	0
236	2011-01-12	2012-08-28	20	0	2011	2011	0	8.5	0	NA	NA	NA	8	6	NA	NA	NA	0	0	NA	NA	0	1	0	0	0
237	2011-01-12	2011-04-26	3	1	2011	2011	1	3.5	0	2	2011-04-26	NA	19	NA	NA	NA	NA	0	NA	NA	NA	0	1	0	0	0
240	2011-01-12	2013-04-01	27	1	2011	2013	1	6.5	0	0	2013-04-01	NA	13	43	NA	NA	NA	0	0	NA	NA	0	1	0	0	0
241	2011-01-12	2012-03-23	14	1	2011	2012	1	8.5	0	3	2012-03-23	NA	10	2	NA	NA	NA	0	0	NA	NA	0	1	0	0	0
242	2011-01-12	2013-04-25	27	1	2011	2013	1	0.5	0	6	2013-04-25	NA	NA	40	5	NA	NA	NA	0	0	NA	0	1	0	0	0
243	2011-01-12	2014-01-01	36	0	2011	2014	0	3.5	0	NA	NA	NA	8	NA	NA	15	NA	0	NA	NA	0	0	1	0	0	0
244	2011-01-12	2014-01-01	36	0	2011	2014	0	5.5	0	NA	NA	NA	34	NA	NA	22	NA	0	NA	NA	0	0	1	0	0	1
245	2011-01-13	2014-01-01	36	0	2011	2014	0	3.5	0	NA	NA	NA	22	NA	NA	NA	NA	0	NA	NA	NA	0	0	1	0	0
246	2011-01-13	2014-01-01	36	0	2011	2014	0	3.5	0	NA	NA	NA	24	30	NA	18	NA	0	0	NA	0	0	0	1	0	0
247	2011-01-13	2014-01-01	36	0	2011	2014	0	7.5	0	NA	NA	NA	19	11	NA	10	NA	0	0	NA	0	0	0	1	0	1
248	2011-01-13	2014-01-01	36	0	2011	2014	0	2.5	0	NA	NA	NA	8	14	NA	17	NA	0	0	NA	0	0	0	1	0	0
249	2011-01-13	2011-12-31	12	1	2011	2011	1	2.5	0	0	2011-12-31	NA	17	NA	NA	NA	NA	0	NA	NA	NA	0	0	1	0	1
250	2011-01-13	2014-01-01	36	0	2011	2014	0	5.5	0	NA	NA	NA	13	7	0	11	NA	0	0	0	0	0	1	0	0	1
251	2011-01-13	2012-02-15	13	0	2011	2012	1	8.5	0	4	2012-02-15	NA	19	7	NA	NA	NA	0	0	NA	NA	0	0	1	0	0
252	2011-01-13	2014-01-01	36	0	2011	2014	0	2.5	0	NA	NA	NA	19	0	4	12	NA	0	0	0	0	0	0	1	0	0
254	2011-01-13	2014-01-01	36	0	2011	2014	0	4.5	0	NA	NA	NA	14	4	NA	13	NA	0	0	NA	0	0	1	0	0	0
255	2011-01-13	2012-02-15	13	0	2011	2012	1	3.5	0	4	2012-02-15	NA	9	13	NA	NA	NA	0	0	NA	NA	0	1	0	0	0
256	2012-02-09	2013-06-15	16	1	2012	2013	1	0.5	0	0	2013-06-15	NA	NA	NA	10	NA	NA	NA	NA	0	NA	0	0	0	1	1
257	2012-02-09	2012-02-09	NA	NA	NA	NA	1	0.5	1	4	2012-02-09	NA	NA	NA	NA	NA	NA	NA	NA	NA	NA	NA	NA	NA	NA	0
258	2012-02-09	2013-01-01	11	0	2012	2012	0	1.5	1	NA	NA	NA	NA	7	NA	NA	NA	NA	0	NA	NA	NA	NA	NA	NA	0
259	2011-02-09	2011-02-09	0	0	NA	NA	0	1.5	1	NA	NA	NA	NA	8	NA	NA	NA	NA	0	NA	NA	NA	NA	NA	NA	1
260	2012-02-10	2013-01-01	11	0	2012	2012	0	2.5	1	NA	NA	NA	NA	6	NA	NA	NA	NA	2	NA	NA	NA	NA	NA	NA	0
261	2012-02-10	2013-01-01	11	0	2012	2012	0	2.5	1	NA	NA	NA	NA	5	NA	NA	NA	NA	0	NA	NA	NA	NA	NA	NA	1
262	2012-02-10	2013-01-01	11	0	2012	2012	0	2.5	1	NA	NA	NA	NA	31	NA	NA	NA	NA	0	NA	NA	NA	NA	NA	NA	0
263	2012-02-10	2013-10-01	20	0	2012	2012	1	3.5	1	5	NA	NA	NA	3	NA	NA	NA	NA	0	NA	NA	NA	NA	NA	NA	1
264	2012-02-11	2012-08-01	6	1	2012	2012	1	5.5	1	0	NA	NA	NA	0	NA	NA	NA	NA	0	NA	NA	NA	NA	NA	NA	1
265	2012-02-11	2013-02-16	12	0	2012	2013	0	0.5	1	NA	NA	NA	NA	NA	8	NA	NA	NA	NA	0	NA	NA	NA	NA	NA	0
266	2012-02-11	2013-12-01	22	1	2012	2013	1	0.5	0	0	NA	NA	NA	NA	85	NA	NA	NA	NA	85	NA	0	1	0	0	0
267	2012-02-11	2012-10-15	8	1	2012	2012	1	5.5	1	0	NA	NA	NA	2	NA	NA	NA	NA	1	NA	NA	NA	NA	NA	NA	0
269	2012-02-11	2012-12-15	10	1	2012	2012	1	3.5	1	2	NA	NA	NA	5	NA	NA	NA	NA	5	NA	NA	NA	NA	NA	NA	0
272	2012-02-11	2012-10-01	8	0	2012	2012	1	4.5	1	5	NA	NA	NA	5	NA	NA	NA	NA	0	NA	NA	NA	NA	NA	NA	0
273	2012-02-11	2013-03-01	13	1	2012	2013	1	0.5	0	0	2013-03-01	NA	NA	NA	10	NA	NA	NA	NA	0	NA	0	1	0	0	1
274	2012-02-11	2013-01-01	11	0	2012	2012	0	3.5	1	NA	NA	NA	NA	4	NA	NA	NA	NA	0	NA	NA	NA	NA	NA	NA	NA
275	2012-02-12	2014-01-01	23	0	2012	2014	0	0.5	0	NA	NA	NA	NA	NA	NA	NA	NA	NA	NA	NA	NA	0	1	0	0	0
276	2012-02-12	2012-02-15	NA	NA	NA	NA	1	0.5	1	4	2012-02-15	NA	NA	NA	NA	NA	NA	NA	NA	NA	NA	NA	NA	NA	NA	1
277	2012-02-12	2012-02-12	NA	NA	NA	NA	NA	2.5	1	NA	NA	NA	NA	4	NA	NA	NA	NA	0	NA	NA	NA	NA	NA	NA	1
278	2012-02-13	2012-08-01	6	1	2012	2012	1	4.5	1	0	NA	NA	NA	1	NA	NA	NA	NA	0	NA	NA	NA	NA	NA	NA	0
279	2012-02-13	2013-01-01	11	0	2012	2012	0	9.5	1	NA	NA	NA	NA	1	NA	NA	NA	NA	0	NA	NA	NA	NA	NA	NA	1
280	2012-02-13	2013-01-01	11	0	2012	2012	0	4.5	1	NA	NA	NA	NA	5	NA	NA	NA	NA	0	NA	NA	NA	NA	NA	NA	NA
281	2012-02-13	2013-01-01	11	0	2012	2012	0	5.5	1	NA	NA	NA	NA	3	NA	NA	NA	NA	0	NA	NA	NA	NA	NA	NA	1
282	2012-02-14	2012-08-01	6	0	2012	2012	1	3.5	1	5	NA	NA	NA	3	NA	NA	NA	NA	0	NA	NA	NA	NA	NA	NA	1
999	2011-01-07	2011-01-07	NA	NA	NA	NA	1	NA	0	4	2011-01-07	NA	NA	NA	NA	NA	NA	NA	NA	NA	NA	1	0	0	0	NA
286	2013-02-16	2014-01-01	11	0	2013	2014	0	NA	1	NA	NA	NA	NA	NA	7	NA	NA	NA	NA	0	NA	NA	NA	NA	NA	NA
300	2013-02-16	2013-02-16	0	NA	NA	NA	1	NA	1	4	2013-02-16	NA	NA	NA	8	NA	NA	NA	NA	0	NA	NA	NA	NA	NA	NA
301	2013-02-17	2014-01-01	10	0	2013	2014	0	NA	1	NA	NA	NA	NA	NA	2	NA	NA	NA	NA	0	NA	NA	NA	NA	NA	NA
302	2013-02-17	2014-01-01	10	0	2013	2014	0	NA	1	NA	NA	NA	NA	NA	2	NA	NA	NA	NA	0	NA	NA	NA	NA	NA	NA
303	2013-02-17	2014-01-01	10	0	2013	2014	0	NA	1	NA	NA	NA	NA	NA	11	NA	NA	NA	NA	0	NA	NA	NA	NA	NA	NA
304	2013-02-17	2014-01-01	10	0	2013	2014	0	NA	1	NA	NA	NA	NA	NA	5	NA	NA	NA	NA	0	NA	NA	NA	NA	NA	0
305	2013-02-17	2014-01-01	10	0	2013	2014	0	NA	1	NA	NA	NA	NA	NA	8	NA	NA	NA	NA	0	NA	NA	NA	NA	NA	NA
306	2013-02-17	2014-01-01	10	0	2013	2014	0	NA	1	NA	NA	NA	NA	NA	3	NA	NA	NA	NA	0	NA	NA	NA	NA	NA	NA
307	2013-02-17	2014-01-01	10	0	2013	2014	0	NA	1	NA	NA	NA	NA	NA	5	NA	NA	NA	NA	0	NA	NA	NA	NA	NA	0
308	2013-02-17	2014-01-01	10	0	2013	2014	0	NA	1	NA	NA	NA	NA	NA	9	NA	NA	NA	NA	0	NA	NA	NA	NA	NA	1

## Sheet: metadata
Data Column	Description	Values
deerid	Ear tag	Values 1 - 308; initial ear tag used for animal if it was replaced with another tag in future years
datein	date entered	1/1/2010 - 1/1/2014
dateout	date exited	1/1/2010 - 1/1/2014
exit_mo	months in study; time till death or when collar removed/malfunctioned	0 - 48
delta	0,1 indicator whether whether animal was censored (capture death, harvest, collar failed or removed)	0 = censored; 1= not censored
entry_yr	year entered	2010 - 2014
exit_yr	year exited	2010 - 2014
mortality	0,1 indicator if animal died (includes harvests)	0 = not detected as dead; 1 = detected death
strtage	age at time of first handling	0.5 - 10.5
sex	male vs female	0 =male; 1= female
cause	cause of death	0 = unknown; 1 = cwd; 2=predation; 3=mva; 4=capture related death; 5=harvest; 6=winterkill/starvation
dod	date of death	any valid date
J_yr1	total follicles in RMALT including recut 2010	0-100
J_yr2	total follicles in RMALT including recut 2011	0-101
J_yr3	total follicles in RMALT including recut 2012	0-102
J_yr4	total follicles in RMALT including recut 2013	0-103
J_yr5	total follicles in RMALT including recut 2014	0-104
y_yr1	number of follicles showing PRNP including recut 2010	0-105
y_yr2	number of follicles showing PRNP including recut 2011	0-106
y_yr3	number of follicles showing PRNP including recut 2012	0-107
y_yr4	number of follicles showing PRNP including recut 2013	0-108
y_yr5	number of follicles showing PRNP including recut 2014	0-109
campbell	0,1 indicator in campbell subpoopulation	1 indicates member of subpopulation
redmtn	0,1 indicator in red mountain subpoopulation	1 indicates member of subpopulation
cherokee	0,1 indicator in cherokee park subpoopulation	1 indicates member of subpopulation
bighole	0,1 indicator in big hole subpoopulation	1 indicates member of subpopulation
F	0,1 indicator if 225SF or 225FF	1 indicates member of genotype
